# Supplementary material for: NaOH-catalyzed crossed Claisen condensation between ketene silyl acetals and methyl esters
Source: Royal Society of Chemistry journal article supplement (doi:10.1039/b504750a), 2005-01-01
Supplement: b504750a.pdf [file b504750a.pdf]

Supplementary Information

**Mukaiyama Aldol Reaction (Method A) (Table 3, Entry 1)**

TiCl<sub>4</sub> (68 mg, 0.36 mmol) was added to a stirred solution of methyl 2,2-dimethyl-3-(trimethylsilyloxy)dodec-3-enoate (100 mg, 0.30 mmol) and benzaldehyde (38 mg, 0.36 mmol) in CH<sub>2</sub>Cl<sub>2</sub> (0.9 cm<sup>-3</sup>) at -45 °C under an Ar atmosphere. After stirring at the same temperature for 1 h, the mixture was quenched with water, which was extracted with AcOEt. The organic phase was washed with water, brine, dried (Na<sub>2</sub>SO<sub>4</sub>) and concentrated. The obtained crude product was purified by silica-gel column chromatography (hexane : ether = 7 : 1) to give methyl 4-(hydroxy(phenyl)methyl)-2,2-dimethyl-3-oxododecanoate (80 mg, 73%).

colorless oil; (*syn* : *anti* / 93 : 7); <sup>1</sup>H NMR (300 MHz, CDCl<sub>3</sub>): δ 0.77-0.97 (1H, m), 0.85 (3H, t, *J* 6.9 Hz), 0.99-1.53 (12H, m), 1.33 (3H, s), 1.35 (3H, s), 1.53-1.75 (1H, m), 3.08-3.26 (1H, m), 3.66 (*anti*, 0.07 x 3H, s), 3.73 (*syn*, 0.93 x 3H, s), 4.80 (*anti*, 0.07H, d, *J* 6.5 Hz), 4.94 (*syn*, 0.93H, d, *J* 3.4 Hz), 7.20-7.40 (5H, m); <sup>13</sup>C NMR (75 MHz; CDCl<sub>3</sub>): δ 14.03, 21.68, 21.86, 22.03, 22.58, 26.29, 27.74, 29.10, 29.20, 29.79, 31.74, 52.47, 53.50, 54.04, 56.71, 73.00, 75.24, 125.89, 126.30, 127.39, 127.77, 128.23, 128.40, 141.59, 173.43, 212.67; IR (neat) 3520, 2928, 1736, 1703, 1265, 1030, 702 cm<sup>-1</sup>.

**Ti-Direct Aldol Reaction (Method B) (Table 3, Entry 2)**

TiCl<sub>4</sub> (114 mg, 0.60 mmol) and Bu<sub>3</sub>N (130 mg, 0.70 mmol) was successively added to a solution of methyl 2,2-dimethyl-3-oxododecanoate (128 mg, 0.50 mmol) in CH<sub>2</sub>Cl<sub>2</sub> (1.5 cm<sup>-3</sup>) at 0 - 5 °C under an Ar atmosphere, and the mixture was stirred at the same temperature for 30 min. Then, benzaldehyde (64 mg, 0.60 mmol) was added to the mixture at the same temperature. After stirring for 2 h, the mixture was quenched with water, which was extracted with AcOEt. The organic phase was washed with water, brine, dried (Na<sub>2</sub>SO<sub>4</sub>), and concentrated. The obtained crude product was purified by silica-gel column chromatography (hexane : ether = 7 : 1) to give the desired product (142 mg, 78%). colorless oil; (*syn* : *anti* / 93 : 7).

**Methyl 4-(1-hydroxyhexyl)-2,2-dimethyl-3-oxododecanoate (Table 3, Entries 3 and 4)**

(*syn* : *anti* = 72 : 28); colorless oil;  $^1\text{H}$  NMR (300 MHz,  $\text{CDCl}_3$ ):  $\delta$  0.78 (6H, m), 1.10-1.73 (22H, m), 1.40 (6H, s), 2.20-2.64 (1H, brs), 2.78-2.95 (1H, m), 3.62-3.76 (1H, m) 3.72 (3H, s);  $^{13}\text{C}$  NMR (75 MHz;  $\text{CDCl}_3$ ):  $\delta$  13.99, 14.03, 22.00, 22.21, 22.27, 22.31, 22.54, 22.60, 25.73, 25.90, 26.23, 27.30, 28.33, 29.19, 29.33, 29.59, 29.73, 30.00, 31.70, 31.77, 34.39, 35.73, 51.60, 51.87, 52.35, 56.65, 56.90, 71.62, 72.02, 173.46, 173.50, 213.06, 213.79; IR (neat) 3524, 2928, 1739, 1703, 1466, 1149  $\text{cm}^{-1}$ .

**Methyl 4-(benzyloxy)-5-hydroxy-2,2-dimethyl-3-oxo-5-phenylpentanoate (Table 3, Entries 5 and 6)**

(*syn* : *anti* / 25 : 75); colorless oil;  $^1\text{H}$  NMR (300 MHz,  $\text{CDCl}_3$ ):  $\delta$  1.19 (*anti*, 0.75 x 3H, s), 1.24 (*syn*, 0.25 x 3H, s), 1.30 (*syn*, 0.25 x 3H, s), 1.31 (*anti*, 0.75 x 3H, s), 3.37 (*anti*, 0.75 x 3H, s), 3.42 (*syn*, 0.25 x 3H), 3.99 (*syn*, 0.25 x 1H, d,  $J$  10.7 Hz), 4.09 (*anti*, 0.75 x 1H, d,  $J$  10.7 Hz), 4.22 (*anti*, 0.75 x 1H, d,  $J$  6.2 Hz), 4.32 (*anti*, 0.75 x 1H, d,  $J$  10.7 Hz), 4.34 (*syn*, 0.25 x 1H, d,  $J$  10.7 Hz), 4.36 (*syn*, 0.25 x 1H, d,  $J$  2.8 Hz), 5.06 (*anti*, 0.75 x 1H, d,  $J$  6.2 Hz), 5.25 (*syn*, 0.25 x 1H, d,  $J$  2.8 Hz), 7.01-7.17 (2H, m), 7.19-7.45 (8H, m);  $^{13}\text{C}$  NMR (75 MHz;  $\text{CDCl}_3$ ):  $\delta$  20.93, 21.14, 22.17, 22.40, 51.81, 51.98, 53.34, 53.53, 73.13, 74.22, 74.45, 75.75, 86.21, 87.33, 126.07, 127.45, 127.53, 127.58, 127.85, 128.08, 128.14, 128.27, 136.63, 136.93, 139.69, 140.82, 173.26, 173.82, 208.28, 210.11; IR (neat) 3499, 2949, 1749, 1714, 1454, 1151, 702  $\text{cm}^{-1}$ .

**NMR data for methyl 2,2-dimethyl-3-(trimethylsiloxy)dodec-3-enoate (A), and methyl 2,2-dimethyl-3-oxododecanoate (B)**

(A) :  $^1\text{H}$  NMR (300 MHz;  $\text{CDCl}_3$ ):  $\delta$  0.16 (9H, s), 0.80 (3H, t,  $J$  7.6 Hz), 0.88 (3H, t,  $J$  6.9 Hz), 1.23-1.35 (12H, m), 1.24 (3H, s), 1.71 (1H, dq,  $J$  7.6 Hz,  $J$  13.4 Hz), 1.78 (1H, dq,  $J$  7.6 Hz,  $J$  13.4 Hz), 1.88-2.07 (2H, m), 3.65 (3H, s), 4.56 (1H, t,  $J$  6.9 Hz).  $^{13}\text{C}$  NMR (75 MHz;  $\text{CDCl}_3$ ):  $\delta$  1.74, 25.24, 28.53, 36.79, 48.95, 51.95, 109.49, 114.13, 147.94, 151.55, 176.64. IR (neat) 2926, 2855, 1738, 1665, 1252, 1148, 1125, 1103, 847  $\text{cm}^{-1}$ . (B) :  $^1\text{H}$  NMR (300 MHz;  $\text{CDCl}_3$ ):  $\delta$  0.87 (3H, t,  $J$  6.9 Hz), 1.20-1.30 (12H, m), 1.35 (6H, s), 1.51-1.63 (2H, m), 2.41 (2H, t,  $J$  7.2 Hz), 3.71 (3H, s).  $^{13}\text{C}$  NMR (75 MHz;  $\text{CDCl}_3$ ):  $\delta$  14.09, 21.93, 22.64, 23.84, 29.10, 29.25, 29.41, 31.85, 37.92, 52.37, 55.58, 174.29, 208.11. IR (neat) 2921, 2857, 1747, 1716, 1466, 1267, 1150  $\text{cm}^{-1}$ .

<Proposed stereochemical mechanism of Ti-aldol reactions in Table 3>

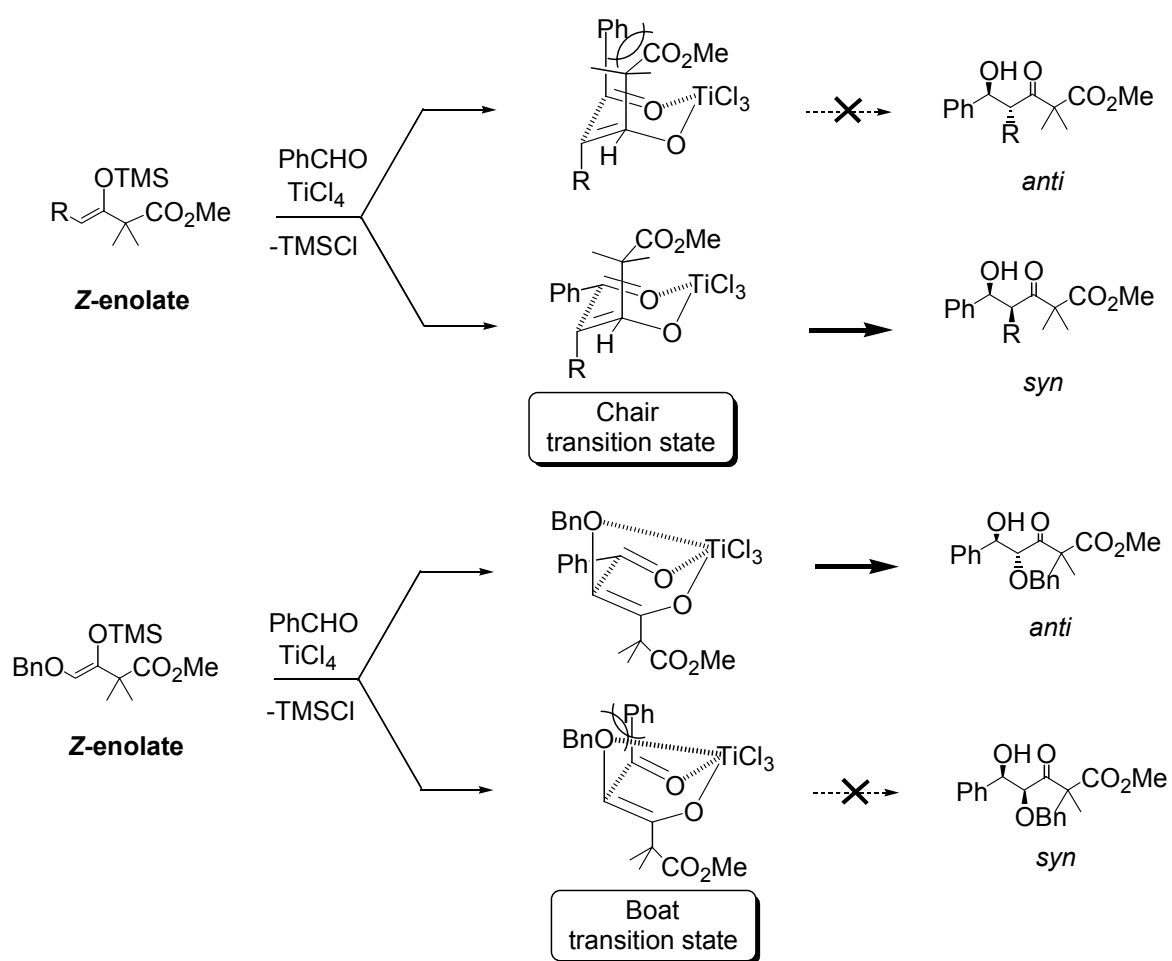

# Supplementary Material (ESI) for Chemical Communications

# This journal is © The Royal Society of Chemistry 2005
